# Supplementary material for: A Minimal Connected Network of Transcription Factors Regulated in Human Tumors and Its Application to the Quest for Universal Cancer Biomarkers
Source: PubMed Central journal article supplement (PMC3382591; doi:10.1371/journal.pone.0039666), 2012-06-25
Supplement: pone.0039666.s005.pdf [file pone.0039666.s005.pdf]

*Table S1: Transcription factors regulated in cancer cell lines*

*For each TF, the TF-TF correlations profiles were determined and the following model was fitted:  $reg \sim \beta_0 + \beta_1 * exp + \beta_2 * cnv$ . Where, for each TF versus the others: “reg” is the regulation correlation profile, “exp” is the TF-coding gene expression correlation profile and “cnv” is the TF coding-gene locus copy number variation correlation profile.*

| <b>TF</b> | <b>Expression correlation effect (<math>\beta_1</math> p-value)</b> | <b>CNV correlation effect (<math>\beta_2</math> p-value)</b> |
|-----------|---------------------------------------------------------------------|--------------------------------------------------------------|
| TP53      | 2.56E-12                                                            | 4.76E-02                                                     |
| ONECUT1   | 9.98E-10                                                            | 1.26E-02                                                     |
| RARA      | 5.44E-09                                                            | 2.33E-02                                                     |
| PGR       | 7.19E-09                                                            | 4.39E-04                                                     |
| STAT1     | 9.71E-09                                                            | 3.75E-04                                                     |
| CREB1     | 1.28E-08                                                            | 1.58E-02                                                     |
| PITX2     | 4.03E-08                                                            | 3.82E-03                                                     |
| CREBBP    | 1.37E-07                                                            | 1.91E-04                                                     |
| POU1F1    | 4.06E-07                                                            | 4.65E-02                                                     |
| PPARA     | 4.70E-07                                                            | 1.45E-03                                                     |
| FOXA2     | 5.74E-07                                                            | 2.03E-03                                                     |
| SMAD1     | 6.29E-07                                                            | 1.16E-02                                                     |
| ATF6      | 7.90E-07                                                            | 1.12E-02                                                     |
| CEBPG     | 8.89E-07                                                            | 2.53E-02                                                     |
| SOX10     | 1.51E-06                                                            | 7.52E-03                                                     |
| ETS1      | 2.03E-06                                                            | 2.77E-03                                                     |
| MYBL1     | 2.09E-06                                                            | 6.76E-03                                                     |
| SREBF1    | 2.20E-06                                                            | 4.69E-02                                                     |
| MYC       | 2.44E-06                                                            | 3.98E-03                                                     |
| E2F6      | 3.68E-06                                                            | 2.36E-02                                                     |
| ZBTB16    | 3.89E-06                                                            | 8.09E-06                                                     |
| ERG       | 5.14E-06                                                            | 5.72E-03                                                     |
| HIF1A     | 1.05E-05                                                            | 1.42E-03                                                     |
| PPARD     | 1.38E-05                                                            | 2.06E-02                                                     |
| TCF7      | 2.35E-05                                                            | 3.23E-04                                                     |
| NFIA      | 2.40E-05                                                            | 4.06E-03                                                     |
| SP2       | 3.72E-05                                                            | 5.21E-04                                                     |
| POU2F2    | 4.54E-05                                                            | 4.26E-02                                                     |

|        |          |          |
|--------|----------|----------|
| NR3C1  | 5.08E-05 | 1.11E-03 |
| ID1    | 1.37E-04 | 3.54E-02 |
| MSX2   | 1.52E-04 | 9.45E-03 |
| PAX3   | 1.60E-04 | 4.90E-02 |
| FOS    | 1.63E-04 | 1.80E-03 |
| REST   | 1.85E-04 | 1.81E-06 |
| SMAD7  | 1.98E-04 | 3.00E-04 |
| POU5F1 | 2.43E-04 | 9.11E-03 |
| NFATC2 | 2.84E-04 | 6.62E-03 |
| CEBPE  | 3.01E-04 | 1.66E-02 |
| E2F2   | 4.07E-04 | 2.02E-02 |
| FOSB   | 4.10E-04 | 4.20E-03 |
| EBF1   | 4.25E-04 | 8.35E-07 |
| GATA3  | 4.77E-04 | 3.15E-02 |
| SMAD6  | 4.81E-04 | 6.37E-04 |
| FOXH1  | 4.89E-04 | 2.60E-05 |
| GLI1   | 4.95E-04 | 1.81E-03 |
| STAT5A | 5.81E-04 | 2.33E-07 |
| GLI2   | 6.60E-04 | 4.64E-03 |
| HNF4A  | 6.70E-04 | 2.39E-04 |
| CEBPA  | 6.77E-04 | 1.59E-03 |
| STAT3  | 8.08E-04 | 1.90E-06 |
| LEF1   | 8.69E-04 | 8.73E-03 |
| HOXC8  | 9.56E-04 | 4.12E-02 |
| NANOG  | 9.94E-04 | 3.27E-02 |
| GABPA  | 9.96E-04 | 1.18E-02 |
| MEF2A  | 1.44E-03 | 1.74E-04 |
| ATF4   | 1.47E-03 | 1.32E-02 |
| YY1    | 1.53E-03 | 8.75E-03 |
| EPAS1  | 1.65E-03 | 1.94E-02 |
| FOXO1  | 1.96E-03 | 2.13E-04 |
| ESR1   | 2.06E-03 | 6.92E-04 |
| BRCA1  | 2.06E-03 | 3.88E-04 |
| CDX1   | 2.22E-03 | 9.86E-04 |
| RARB   | 2.26E-03 | 2.07E-02 |

|        |          |          |
|--------|----------|----------|
| NR2F1  | 3.03E-03 | 4.22E-02 |
| BCL3   | 3.03E-03 | 1.92E-02 |
| PDX1   | 3.35E-03 | 7.14E-03 |
| HOXA5  | 3.67E-03 | 1.31E-02 |
| ESR2   | 4.00E-03 | 4.59E-03 |
| STAT5B | 4.19E-03 | 1.45E-07 |
| REL    | 4.32E-03 | 3.00E-03 |
| OLIG1  | 6.07E-03 | 1.05E-02 |
| NFYA   | 6.93E-03 | 8.00E-03 |
| RXRA   | 8.61E-03 | 1.71E-04 |
| DLX5   | 9.38E-03 | 4.66E-03 |
| NR5A1  | 9.42E-03 | 5.55E-03 |
| TRPS1  | 1.34E-02 | 1.02E-02 |
| SREBF2 | 1.52E-02 | 2.63E-03 |
| THRA   | 1.52E-02 | 2.38E-02 |
| HOXD3  | 1.57E-02 | 1.35E-02 |
| RARG   | 1.79E-02 | 1.99E-02 |
| CDKN1A | 1.92E-02 | 4.65E-05 |
| RBPJ   | 2.00E-02 | 2.80E-03 |
| FLI1   | 2.32E-02 | 9.55E-06 |
| E2F4   | 2.46E-02 | 5.89E-04 |
| RUNX1  | 2.77E-02 | 9.26E-04 |
| TEAD1  | 3.43E-02 | 1.81E-02 |
| NFKB2  | 4.46E-02 | 1.02E-02 |
| SP4    | 4.60E-02 | 1.35E-03 |
