# Supplementary material for: A Minimal Connected Network of Transcription Factors Regulated in Human Tumors and Its Application to the Quest for Universal Cancer Biomarkers
Source: PubMed Central journal article supplement (PMC3382591; doi:10.1371/journal.pone.0039666), 2012-06-25
Supplement: pone.0039666.s007.pdf [file pone.0039666.s007.pdf]

Table S3: Evidences of VEGFA, TFRC and MET associations to cancer from non-exhaustive literature screening

| <b>Protein</b> | <b>cancer type</b>               | <b>Pubmed reference ids</b>  |
|----------------|----------------------------------|------------------------------|
| VEGFA          | Liver cancer                     | 21802642; 12810638           |
|                | Skin cancer                      | 21284506; 12170181           |
|                | Colo-rectal cancer               | 21081932                     |
|                | malignant gynecological diseases | 20442584                     |
|                | Ovarian cancer                   | 20071014                     |
|                | Brain cancer                     | 19661350; 19522573           |
|                | Lung cancer                      | 19157636; 17917830; 20357617 |
|                | Pancreatic cancer                | 18665074                     |
|                | Thyroid Cancer                   | 11932308                     |
| TFRC           | Lymphoma                         | 12218295; 6131211            |
|                | Leukemia                         | 2582441                      |
|                | Breast cancer                    | 3024390                      |
|                | Colo-rectal cancer               | 9735419                      |
|                | Pancreatic cancer                | 15177502                     |
|                | Bladder cancer                   | 2340368                      |
|                | Brain cancer                     | 2110696; 14756479            |
|                | Prostate cancer                  | 15514585                     |
|                | Liver cancer                     | 2836292                      |
|                | Lung cancer                      | 2414490                      |
|                | Skin cancer                      | 3549812                      |
| Oral cancer    | 1607823                          |                              |
| MET            | Thyroid Cancer                   | 17703498                     |
|                | Ovarian cancer                   | 21945764                     |
|                | Bladder cancer                   | 16400012                     |
|                | Liver cancer                     | 21955323                     |
|                | Breast cancer                    | 21692045                     |
|                | Prostate cancer                  | 19549766                     |
|                | Gastric cancer                   | 21777278                     |
|                | Pancreatic cancer                | 20869080                     |
